# Supplementary material for: Selection of Conserved Epitopes from Hepatitis C Virus for Pan-Populational Stimulation of T-Cell Responses
Source: Clin Dev Immunol. 2013 Nov 21;2013:601943. doi: 10.1155/2013/601943 (PMC3856138; doi:10.1155/2013/601943)
Supplement: Supplementary file 1 — Additional File S1, HCV-specific T cell epitopes. The epitopes were collected from the EPIMHC [22] and IEDB [23] databases. They all were reported to be targeted in the course of a natural infection by HCV in humans and have nine residues. Additional File S2, Multiple sequence alignment of HCV-polyproteins. The alignment was built upon 684 entire HCV-polyproteins using MUSCLE [24] with default settings. Additional File S3, CTL epitopes from HCV reaching PPC ≥ 95%. File shows epitope combinations that were found to reach a PPC ≥ 95% for 5 ethnic groups. Any epitope combination differs from all the others in at least one epitope sequence. [file 601943.f1.zip]

Archive with 3 entries (3 files):
- 601943.f1/Additional_File_S1.9.xls
- 601943.f1/Additional_File_S2.txt
- 601943.f1/Additional_File_S3.txt
